# Supplementary material
Source: publisher figshare collection journal article supplement (https://frontiersin.figshare.com/ndownloader/files/27375959)
Supplement: Supplementary file [file 27375959]

## Appendix

In a sensitivity analysis we further controlled for the influence of other current mental disorders. Here, a unit increase in ZAN-BPD was associated with a 0.35 increase in LPFS/self-functioning (total effect, 95% CI from 0.19 to 0.51,  $p < .001$ ) (a higher score on LPFS/self-functioning indicates lower functioning). The mediation model divided this effect into a direct effect of 0.22 from ZAN-BPD to LPFS/self-functioning (95% CI from 0.07 to 0.58,  $p = .002$ ), and an indirect effect of 0.13 (95% CI 0.04 to 0.23  $p = .006$ ), mediated via MZQ. The mediator effect was modest and not statistically significant at both stages, with -0.05 (95% CI -0.08 to -0.02,  $p = .003$ ) from ZAN-BPD to MZQ (the negative sign reflects that the rating assesses severity, whereas MZQ assesses the ability to mentalize), and -2.5 (95% CI -3.3 to -1.9,  $p < .001$ ) from MZQ to LPFS/self-functioning (the negative sign reflects that the ZAN-BPD rating assessed severity, MZQ assessed ability to mentalize, and LPFS-BF assessed problems in self-functioning). The influence of the covariates, gender, age, and other current mental disorders, was not statistically significant.

In the sensitivity analysis for interpersonal functioning a unit increase in ZAN-BPD was associated with a 0.20 increase in LPFS/interpersonal functioning (total effect, 95% CI 0.05 to 0.35,  $p = .011$ ). The direct effect from ZAN-BPD to LPFS/interpersonal functioning was not statistically significant, 0.08 (95% CI -0.06 to 0.22,  $p = .24$ ). The mediator effect via MZQ was modest and not statistically significant at both stages, with -0.05 from ZAN-BPD to MZQ (see above), and -2.2 (95% CI -2.9 to -1.5,  $p < .001$ ) from MZQ to LPFS/interpersonal functioning (the negative relationship reflects that MZQ assessed ability to mentalize and LPFS-BF assessed problems in interpersonal functioning). The influence of the covariates, gender, age, and other current mental disorders was not statistically significant.
